# Supplementary material for: Effect of Graphene on Ice Polymorph
Source: Preprints.org preprint supplement (doi:10.20944/preprints202104.0414.v1), 2021-04-15
Supplement: Supplementary file 4 [file supplementary]

**Supporting Information for**

Effect of Graphene on Ice Polymorph

Chuanbao Zheng⊥, Hao Lu⊥, Tianyi Liu, Quanming Xu, Aniruddha Patil, Jianyang Wu, Zhisen Zhang*

Department of Physics, Research Institute for Biomimetics and Soft Matter, Fujian Provincial Key Laboratory for Soft Functional Materials Research, Xiamen University, Xiamen 361005, China.

Table SI. Cubicity of the nucleation stage in each simulation trajectory.

| **Substrate** | ***Graphene*** | ***O-Haeckelite*** | ***R-Haeckelite*** | ***Random*** | ***Homo*** |
| --- | --- | --- | --- | --- | --- |

| **Ice nucleation** | 8.8 | 47.4 | 61.2 | 65.5 | 33.1 |
| --- | --- | --- | --- | --- | --- |
|  | 52.0 | 56.1 | 51.1 | 16.3 | 53.1 |
|  | 20.0 | 54.4 | 28.8 | 60.9 | 52.7 |
|  | 10.2 | 54.7 | 60.0 | 62.5 | 57.5 |
|  | 41.7 | 59.9 | 66.3 | 28.5 | 57.9 |
|  | 27.6 | 51.5 | 30.2 | 66.6 | 58.0 |
|  | 30.7 | 48.4 | 56.1 | 48.4 | 55.0 |
|  | 62.2 | 51.6 | 44.7 | 72.3 | 44.7 |
|  | 32.1 | 11.3 | 54.0 | 38.2 | 42.4 |
| Cubicity / % | 50.5 | 35.8 | 53.1 | 18.2 | 60.5 |
|  | 54.8 | 38.8 | 38.2 | 46.9 | 61.1 |
|  | 18.9 | 50.0 | 20.7 | 35.8 | 45.8 |
|  | 5.0 | 32.2 | 65.0 | 50.7 | 51.0 |
|  | 37.5 | 53.5 | 50.2 | 39.0 | 58.7 |
|  | 16.2 | 57.3 | 36.2 | 61.2 | 54.9 |
|  | 49.9 | 21.7 | 45.6 | 9.3 | 56.4 |
|  | 5.1 | 22.0 | 40.8 | 8.4 | 52.5 |
|  | 23.3 | 22.5 | 44.8 | 60.9 | 51.7 |
|  | 7.5 | 31.9 | 32.1 | 31.3 | 56.1 |
|  | 49.3 | 46.9 | 48.4 | 63.2 | 44.5 |
| **Freezing** | 57.3 | 47.2 | 52.8 | 70 | 54.3 |
| **Completely** | 38.4 | 52.4 | 61.2 | 43.5 | 60.3 |
|  | 68.1 | 43.0 | 52.0 | 67.9 | 62.5 |
|  | 67.1 | 47.6 | 60.3 | 56.3 | 57.2 |
|  | 44.2 | 45.8 | 59.1 | 39.2 | 60.3 |
|  | 61.9 | 52.5 | 45.9 | 53.5 | 61.1 |
|  | 46.2 | 56.9 | 50.4 | 53.1 | 65.1 |
|  | 44.8 | 47.3 | 70.2 | 58.8 | 63.3 |
|  | 62.4 | 66.9 | 51.7 | 56.6 | 56.0 |
|  | 50.2 | 62.8 | 47.9 | 57.3 | 59.4 |
| Cubicity / % | 52.0 | 44.8 | 62.7 | 42.7 | 57.9 |
|  | 45.8 | 52.6 | 47.4 | 35.4 | 57.2 |
|  | 48.6 | 45.8 | 51.6 | 58.2 | 63.9 |
|  | 30.2 | 41.4 | 59.4 | 50.7 | 55.9 |
|  | 60.2 | 65.4 | 65 | 66.2 | 63.9 |
|  | 42.0 | 53.7 | 58.5 | 67.2 | 46.1 |
|  | 56.8 | 56.9 | 58.7 | 32.7 | 57.3 |
|  | 60.0 | 62.0 | 40.8 | 57.4 | 54.6 |
|  | 46.0 | 56.3 | 56.1 | 54.7 | 55.3 |
|  | 57.7 | 75.6 | 57.3 | 42.8 | 63.4 |


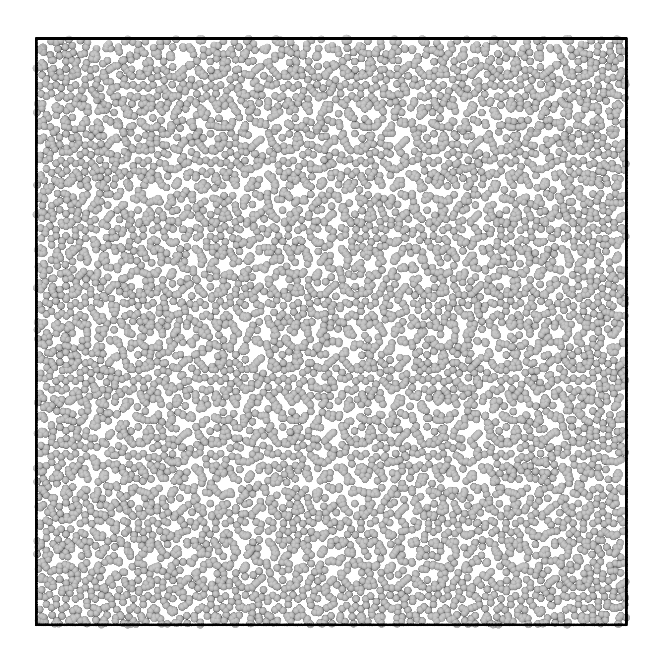


Figure S1. Surface morphology of 2-dimational carbon substrate with all the carbon atoms randomly distributed, the *Random* system.


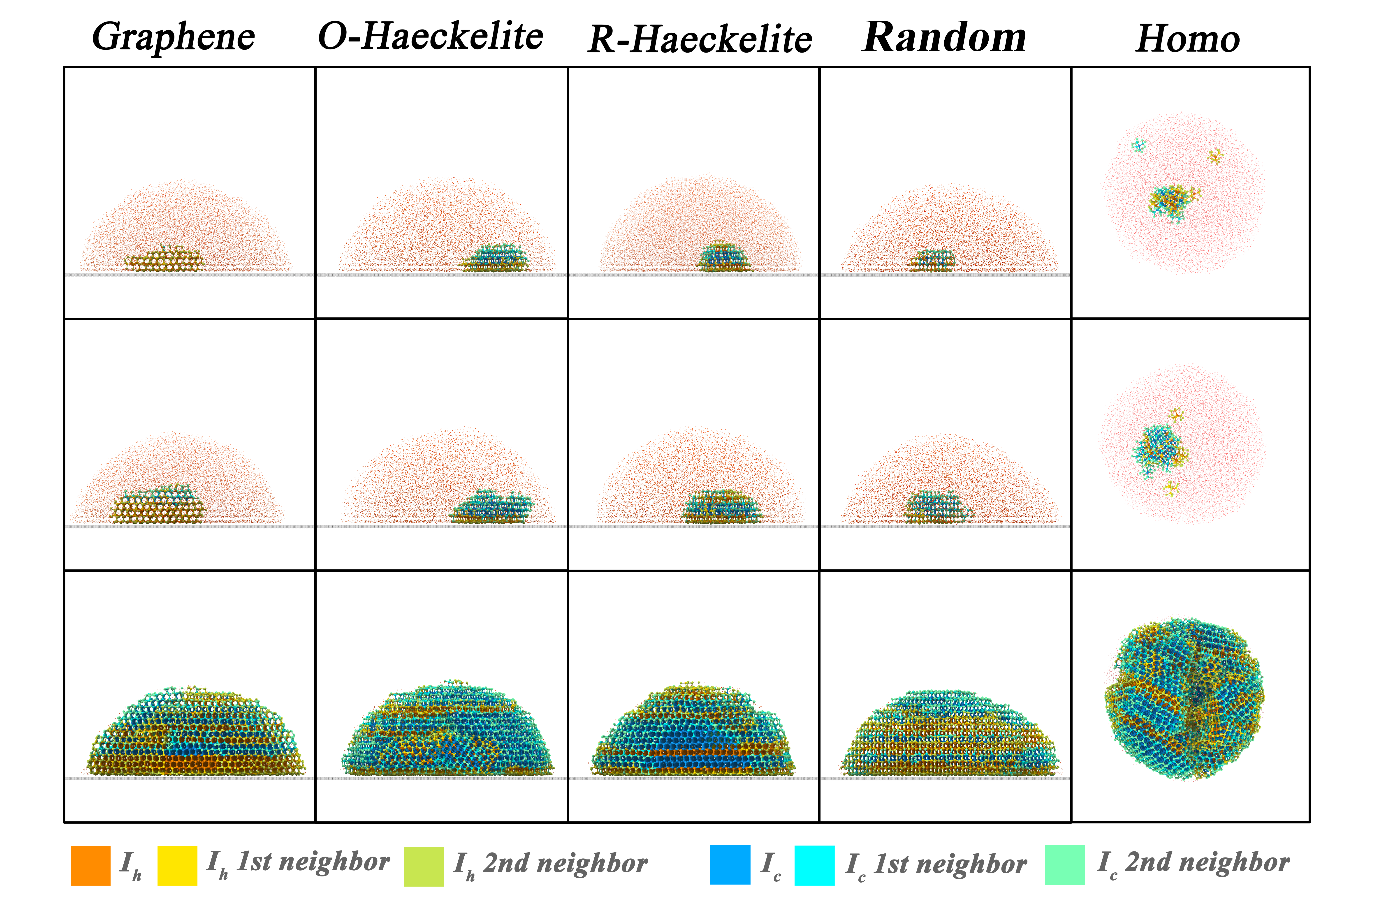


Figure S2. Snapshots of ice nucleation on different (include *Random*)substrate.





Figure S3. Freezing efficiency Δ*T*f of different lattice structure substrate(include *Random*).
